# Supplementary material
Source: publisher site journal article supplement (https://www.dovepress.com/article/562398)
Supplement: Supplementary file 1 [file Supplementary%20Material%201.docx]

Supplementary material 1

**Study Protocol**

**Contents**

[Supplementary material 1 1](#_Toc2105)

[1 Committee composition 1](#_Toc29440)

[1.1 Protocol committee 1](#_Toc5107)

[1.2 Steering committee 1](#_Toc29621)

[1.3 Data coordination committee 2](#_Toc6477)

[1.4 Publication committee 3](#_Toc29659)

[2 Study contacts and organizations 3](#_Toc29790)

[2.1 Study contacts 3](#_Toc11202)

[2.2 Recruiting site 3](#_Toc24191)

[3 Background 3](#_Toc28798)

[4 Study hypotheses 4](#_Toc23821)

[5 Methodology 4](#_Toc3115)

[5.1 Study design 4](#_Toc19232)

[5.2 Randomization and blinding 5](#_Toc26946)

[5.3 Sample size 5](#_Toc32261)

[5.4 Participant recruitment, screening and group assignment 5](#_Toc12722)

[6](#_Toc17022)

[5.5 Inclusion criteria 6](#_Toc18322)

[5.6 Exclusion criteria 7](#_Toc8472)

[6 Outcome measurement 7](#_Toc27826)

[6.1 Primary outcome 7](#_Toc2580)

[6.2 Secondary outcomes 7](#_Toc22350)

[7 Standardized Procedural Checklist  8](#_Toc19894)

[8 Interventions 9](#_Toc9640)

[9 Anesthesia Technique 9](#_Toc11261)

[10 Quality control 10](#_Toc28524)

[11 Statistical analysis 10](#_Toc24326)

[References 10](#_Toc27379)

[Supplemental Figure 1. 13](#_Toc23983)

[Supplemental Table 1. 14](#_Toc16437)

[Supplemental Table 2. 15](#_Toc16101)

# 1 Committee composition

## 1.1 Protocol committee

**Table 1 Protocol committee**

| **Name** | **Affiliation** | **Email address** |
| --- | --- | --- |
| Jing Liu | The First Affiliated Hospital of Zhengzhou University | 13870086476@163.com |
| Zenghui Liang | The First Affiliated Hospital of Zhengzhou University | [zenghuiliang1997@163.com](mailto:zenghuiliang1997@163.com) |
| Wang Heng | The First Affiliated Hospital of Zhengzhou University | [15037390795@163.com](mailto:15037390795@163.com) |
| Shuhan Chen | The First Affiliated Hospital of Zhengzhou University | [chensuhana@163.com](mailto:chensuhana@163.com) |
| Yanle Xie | Chest Hospital of Zhengzhou University | yanlexie1998@163.com |
| Fei Xing | The First Affiliated Hospital of Zhengzhou University | [fccxingf@zzu.edu.cn](mailto:fccxingf@zzu.edu.cn) |
| Zhongyu Wang | The First Affiliated Hospital of Zhengzhou University | [wzy781217@163.com](mailto:wzy781217@163.com) |
| Jianjun Yang | The First Affiliated Hospital of Zhengzhou University | [jianjunyang1971@163.com](mailto:jianjunyang1971@163.com) |
| Jingjing Yuan | The First Affiliated Hospital of Zhengzhou University | [yjingjing_99@163.com](mailto:yjingjing_99@163.com) |

## **1.2 Steering committee**

**Table 2 Steering committee**

| **Name** | **Affiliation** | **Email address** |
| --- | --- | --- |
| Jing Liu | The First Affiliated Hospital of Zhengzhou University | 13870086476@163.com |
| Fei Xing | The First Affiliated Hospital of Zhengzhou University | [fccxingf@zzu.edu.cn](mailto:fccxingf@zzu.edu.cn) |
| Zhongyu Wang | The First Affiliated Hospital of Zhengzhou University | [wzy781217@163.com](mailto:wzy781217@163.com) |
| Jianjun Yang | The First Affiliated Hospital of Zhengzhou University | [jianjunyang1971@163.com](mailto:jianjunyang1971@163.com) |
| Jingjing Yuan | The First Affiliated Hospital of Zhengzhou University | [yjingjing_99@163.com](mailto:yjingjing_99@163.com) |

## **1.3 Data coordination committee**

**Table 3 Data coordination committee**

| **Name** | **Affiliation** | **Email address** |
| --- | --- | --- |
| Jing Liu | The First Affiliated Hospital of Zhengzhou University | 13870086476@163.com |
| Zenghui Liang | The First Affiliated Hospital of Zhengzhou University | [zenghuiliang1997@163.com](mailto:zenghuiliang1997@163.com) |
| Wang Heng | The First Affiliated Hospital of Zhengzhou University | [15037390795@163.com](mailto:15037390795@163.com) |
| Shuhan Chen | The First Affiliated Hospital of Zhengzhou University | [chensuhana@163.com](mailto:chensuhana@163.com) |
| Yanle Xie | Chest Hospital of Zhengzhou University | yanlexie1998@163.com |
| Jingjing Yuan | The First Affiliated Hospital of Zhengzhou University | [yjingjing_99@163.com](mailto:yjingjing_99@163.com) |

## **1.4 Publication committee**

Members of the publication committee include Jing Liu, Zenghui Liang, Wang Heng, Shuhan Chen, Yanle Xie, Fei Xing, Zhongyu Wang, Jianjun Yang, Jingjing Yuan.

# **2 Study contacts and organizations**

## **2.1 Study contacts**

**Principal investigator for trial**

Jingjing Yuan, MD PhD

Department of Anesthesiology, Pain and Perioperative Medicine, The First Affiliated Hospital of

Zhengzhou University, No. 1 East Jianshe Road, Zhengzhou, 450052, China

Email: [yjingjing_99@163.com](mailto:yjingjing_99@163.com)

## **2.2 Recruiting site**

The First Affiliated Hospital of Zhengzhou University

# **3 Background**

Obstructive sleep apnea syndrome (OSAS) affects 9% to 39% of adults, with higher prevalence in men and elderly individuals, representing the most common respiratory sleep disorder[1]. OSAS is characterized by recurrent complete or partial upper airway obstruction due to airway collapse, resulting in hypoventilation, apnea, elevated carbon dioxide levels, and chronic intermittent hypoxia (CIH)[2]. The primary pathophysiologic mechanisms involve hypoxia and oxidative stress, with CIH increasing oxygen free radicals while reducing antioxidant capacity. Oxidative stress contributes to disrupted sleep-wake cycles, endothelial dysfunction, osteoporosis, increased cardiovascular risk, pulmonary vascular remodeling, and neurologic alterations[3]. Additionally, inflammation plays a crucial role in OSAS pathogenesis and progression[4]. OSAS is associated with increased inflammatory mediator expression and elevated proinflammatory cytokines[5]. The most extensively documented inflammatory factors are IL-6 and TNF-α[6,7]. IL-6 has received particular attention for its role in vascular inflammation and its contribution to cardiovascular disease, diabetes, and cognitive deterioration[8-10]. Furthermore, elevated serum IL-6 and TNF-α levels correlate with sleep fragmentation and hypoxia[11,12].

The relationship between OSAS and pain regulation has gained increasing attention. OSAS may exacerbate both chronic and acute pain and impair analgesic mechanisms. Characteristic features of OSAS, including nocturnal hypoxemia, sleep fragmentation, and systemic inflammation, enhance pain perception. Hypoxemia significantly increases proinflammatory cytokine expression, leading to nociceptor sensitization. Furthermore, hypoxia itself modulates intracellular neuronal signaling pathways and contributes to nociceptive sensitization. However, pain management in OSAS patients under hypoxic conditions may alter neuropeptide systems and cause opioid receptor upregulation, exacerbating adverse effects such as respiratory depression and increased opioid sensitivity[13]. Opioids suppress central ventilatory drive by diminishing respiratory center responses to hypoxia and hypercapnia. Additionally, opioids reduce pharyngeal muscle tone, impairing airway patency and contributing to obstructive apneic events and alveolar hypoventilation[14]. Anesthesia in OSAS patients involves sedatives, analgesics, and anesthetic agents that exacerbate OSAS by reducing pharyngeal tone and attenuating arousal responses to hypoxia, hypercapnia, and obstruction, thereby increasing perioperative risk[15].

vitro and in vivo studies demonstrate that ketamine exerts anti-inflammatory effects by inhibiting microglial activation[16]. Ketamine administration reverses the decreased density of parvalbumin-expressing GABAergic neurons (PV neurons) in the medial prefrontal cortex (mPFC) and restores inflammation-disrupted synaptogenesis in the mPFC. Evidence suggests that ketamine's anti-inflammatory effects may be mediated through the BDNF/TrkB signaling pathway or by attenuating the nuclear factor-κB (NF-κB) pathway[17]. The antidepressant mechanism of ketamine may involve NMDA receptor blockade and enhanced synaptic plasticity through the mTOR pathway and BDNF release[18]. Additionally, ketamine affects the kynurenine pathway and inhibits proinflammatory cytokine exacerbation[19,20]. Ketamine is a racemic mixture composed of (S)- and (R)-ketamine that has been in clinical use since 1970. The anesthetic and analgesic properties of ketamine are typically attributed to direct ketamine-induced inhibition of N-methyl-D-aspartate receptors. As a human anesthetic, (S)-ketamine is reported to be twice as potent as racemic ketamine[21]. Esketamine and ketamine reduce inflammation primarily by decreasing proinflammatory cytokines (e.g., TNF-α, IL-6) through multiple mechanisms[22]. Beyond its analgesic efficacy, esketamine has been shown to stimulate respiratory drive by enhancing respiratory center sensitivity to carbon dioxide[23]. Based on these properties of esketamine, we hypothesized that. This study was designed to address this hypothesis.

# **4 Study hypotheses**

The following hypotheses will be tested: perioperative low-dose esketamine administration may reduce systemic inflammation and improve postoperative pain in OSAS patients.

# **5 Methodology**

## **5.1 Study design**

This is a single-center, double-blind, randomized controlled trial in the First Affiliated Hospital of

Zhengzhou University in China. Participants who underwent palatopharyngoplasty will

be randomized into esketamine group or control group (saline) in a 1:1 ratio

## **5.2 Randomization and blinding**

Randomization employed 1:1 block allocation (block size=4) using the R package "blockrand," performed by an independent investigator. Sealed opaque envelopes were opened preoperatively by anesthesia personnel blinded to enrollment, management, and assessment procedures. Subjects were administered esketamine 0.25 mg·kg⁻¹ (Jiangsu Hengrui Pharmaceutical Co Ltd) or matching saline placebo in identical 20-mL syringes, with weight-based dosing calculations. A study nurse prepared syringes for anesthesiologist administration, with blinding maintained for all participants, assessors, and clinical personnel throughout the trial.

## **5.3 Sample size**

In this study, the estimated sample size was calculated by PASS 15.0 based on the results of our preliminary study (unpublished data, n = 12). The mean difference in IL-6 levels between 40 min after infusion and baseline was -0.63 pg · mL-1 in the esketamine group (group E: 0.25 mg · kg-1 within 40 minutes) and 0.14 pg · mL-1 in the control group (group C: the same amount of normal saline within 40 minutes), and the standard deviation (sd) was 1.04 and 1.42 respectively. Assuming that α is 0.05, β is 0.2, and the withdrawal rate is 10%, each group needs 48 patients. Finally, this study needs to recruit 96 patients.

## **5.4 Participant recruitment, screening and group assignment**

Participants (ASA I-Ⅲ) who underwent palatopharyngoplasty will be recruited at the First Affiliated Hospital of Zhengzhou University in China. Written informed consent will be provided by each patient before the enrollment. Enrolled patients were randomly assigned to esketamine group or control group in a 1:1 ratio. The evaluators will record the data on the electronic case report through the whole trial period. The participant flow was shown in Figure 1 and Figure 2. The ethics boards of The First Affiliated Hospital of Zhengzhou University have approved this study.


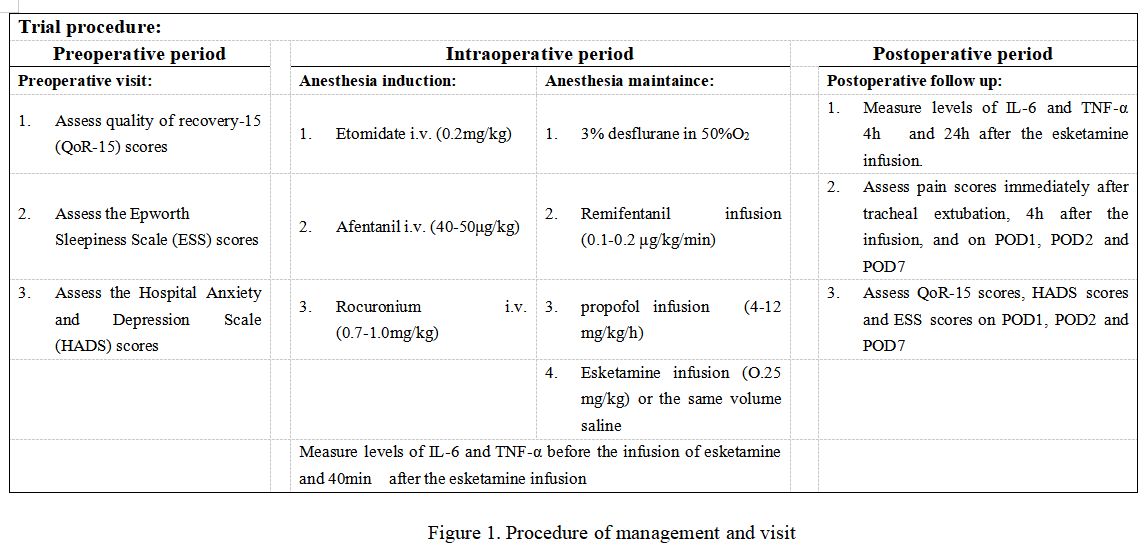


## **
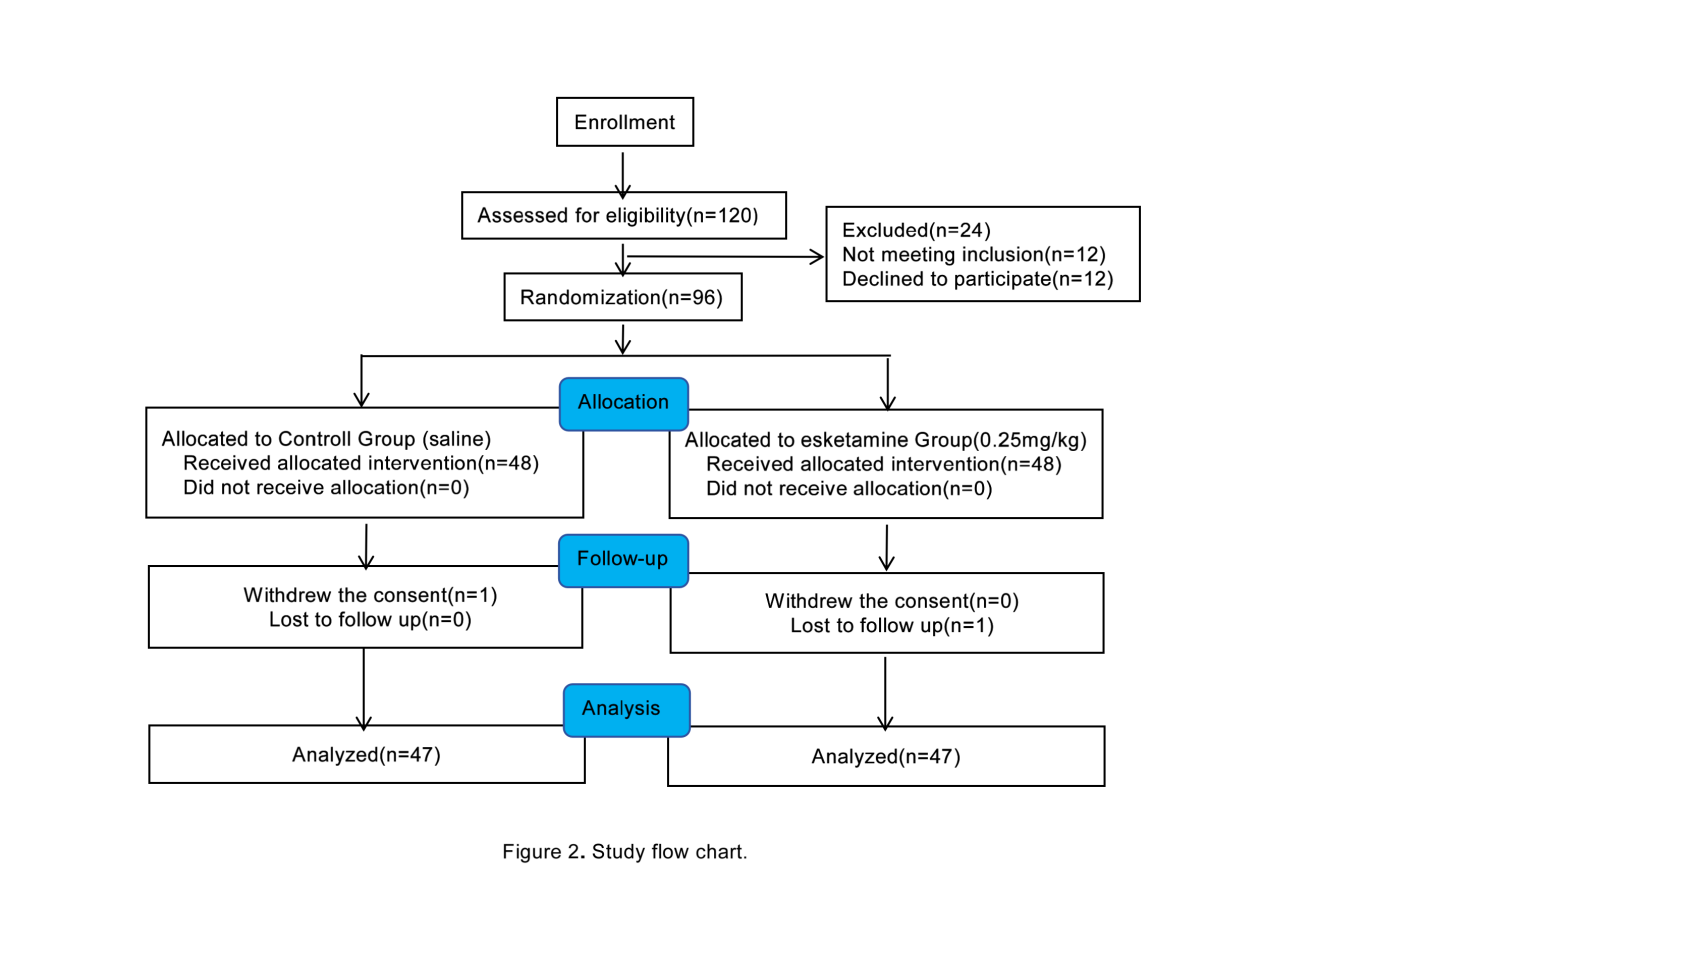
**

## **5.5 Inclusion criteria**

Participants will be included in the study if they meet the following criteria.

1. aged 18 to 70 years with OSAS.
2. American Society of Anesthesiologists Physical Status Ⅰ-Ⅲ.
3. Schedule to undergo palatopharyngoplasty .

## **5.6 Exclusion criteria**

Participants will be excluded from the study if they met the following criteria.

1. active infection.
2. severe cardiopulmonary disease.
3. significant neuropsychiatric disorders or cognitive impairment.
4. recent steroid or NSAID use (within 30 days).
5. esketamine contraindications or allergy.
6. uncontrolled hypertension (SBP >180 mmHg or DBP >110 mmHg).

# **6 Outcome measurement**

## **6.1 Primary outcome**

The primary outcome was the patients’ serum concentration levels of IL-6 and TNF-α at the four time points mentioned above.

## **6.2 Secondary outcomes**

1. Evaluation of pain scores using the NRS scores immediately after tracheal extubation, 4h after the infusion, and on POD1, POD2 and POD7. QoR-15 scores, the Hospital Anxiety and Depression Scale (HADS) scores and the Epworth Sleepiness Scale (ESS) scores on the day before surgery, POD1, POD2 and POD7.
2. Extubation time, PACU length of stay, and RASS scores assessed at 15-minute intervals for one hour following extubation.
3. Rescue analgesia and antiemetics were provided when clinically indicated.
4. Postoperative nausea and vomiting were assessed during PACU recovery.
5. MAP and heart rate were continuously monitored using an anesthesia information system (Docare V5.0, Suzhou Medicalsystem Technology, Suzhou, China) at one-minute intervals, with data recorded at predetermined timepoints: pre-induction (T1), immediate post-extubation (T2), anesthesia completion (T3), and post-extubation period (T4).Patient satisfaction scores.
6. Esketamine-related adverse events were documented, including gastrointestinal effects (nausea, vomiting), neurological symptoms (hallucinations, nightmares, disorientation, dizziness, blurred vision), and cardiopulmonary complications (excessive sedation, respiratory depression).
7. Intraoperative hemodynamic complications were monitored, including hypotension, hypertension, bradycardia, and tachycardia.Preoperative Phase (Screening Day)

# **7 Standardized Procedural Checklist**

**Preoperative Phase (Screening Day)**

- Baseline Assessments:
- Complete Quality of Recovery-15 (QoR-15) questionnaire
- Record Epworth Sleepiness Scale (ESS) score
- Record Hospital Anxiety and Depression Scale (HADS) score

**Intraoperative Phase**

**Anesthesia Induction**

- Draw baseline blood sample for serum IL-6 and TNF-α levels.
- Record hemodynamic parameters (MAP/HR) at: 1 minute before induction, immediately after tracheal intubation, at end of anesthesia, immediately after extubation,

**Intervention & Anesthesia Maintenance**

- Administer study intervention:
- Esketamine Group: Infuse 0.25 mg/kg Esketamine in 20 ml saline over 40 min.
- Control Group: Infuse an equivalent volume of saline over 40 min.
- Record total intraoperative dosages:
- Total volume of study drug (Esketamine/Saline)
- Total dosage of Remifentanil

**Post-Intervention Data Collection**

- Draw blood samples for serum IL-6 and TNF-α at:
- 40 minutes post-infusion start
- 4 hours post-infusion start
- 24 hours post-infusion start

**Immediate Postoperative Phase (PACU)**

- Record Extubation Time and PACU Residence Time.
- Assess NRS Pain Score immediately after extubation.
- Assess Sedation Level using RASS Score at:
- Extubation
- 15 minutes post-extubation
- 30 minutes post-extubation
- 60 minutes post-extubation
- Record administration of:
- Rescue Analgesics
- Antiemetics

**Postoperative Follow-Up (Ward)**

- At 4 hours post-infusion:
- Assess NRS pain score.
- On Postoperative Day 1 (POD1), POD2, and POD7:
- Assess NRS pain score.
- Complete QoR-15 questionnaire.
- Record ESS score.
- Record HADS score.
- On POD1 & POD2 (Additional):
- Record frequency of analgesic reliance in the ward.
- Record patient satisfaction scores.

# **8 Interventions**

Patients in both esketamine group and control group will receive similar intraoperative monitoring and anesthesia management. Patients in esketamine group will receive 0.25 mg · kg-1 of esketamine , and patients in control group will receive an equivalent volume of saline.

# **9 Anesthesia Technique**

All patients received standardized perioperative management without pharmacological premedication. Intraoperative monitoring included standard ASA parameters (electrocardiography, noninvasive blood pressure, capnography, pulse oximetry, and bispectral index). Arterial cannulation under local anesthesia enabled continuous arterial blood pressure and mean arterial pressure assessment. Anesthetic induction was achieved with etomidate 0.2 mg·kg-1, alfentanil 40-50 μg·kg-1, and rocuronium 0.7-1.0 mg· kg-1 to facilitate endotracheal intubation. Mechanical ventilation was initiated with tidal volumes of 8-10 ml·kg-1 and respiratory rates of 10-12 breaths·min-1. Following induction, participants received either esketamine 0.25 mg·kg-1 or equivalent volumes of normal saline (both diluted to 20 ml) via continuous infusion over 40 minutes. Maintenance anesthesia comprised remifentanil 0.1-0.2 μg·kg⁻¹·min⁻¹, propofol 4-12 mg·kg⁻¹·h⁻¹, desflurane 3% in oxygen 50% at 2 L·min⁻¹, with intermittent rocuronium administration. Drug infusions were titrated to maintain hemodynamics within 20% of baseline values and BIS 40-60. Hemodynamic management included atropine 0.5 mg for bradycardia below 50 beats·min-1 and ephedrine or phenylephrine for blood pressure decreases exceeding 20% from baseline. Prophylaxis included propacetamol 2 g and palonosetron 0.25 mg given 30 minutes before case completion.

Postoperatively, anesthetic agents were discontinued and patients were transferred to the PACU while intubated. Neuromuscular reversal with neostigmine 0.3 mg·kg-1 and atropine was administered based on clinical assessment. Extubation occurred following complete recovery of consciousness and muscle strength. Following extubation, patients with NRS pain scores or agitation scores ≥4 received intravenous oxycodone 0.1 mg·kg-1. PACU monitoring continued until Steward recovery scores reached ≥4, at which point ward transfer was permitted. Subsequent pain management in the ward involved propacetamol 2 g for NRS scores ≥4.

# **10 Quality control**

Both paper files and electronic documents will be preserved for at least 5 years after publication. If readers have any questions, they can contact the corresponding author for access to the original data. Patient information will remain anonymous, including name, ID number and telephone number. The protocol will be reviewed and revised by experts in anesthesia management and statistics. We will perform a pre-specified standard operating procedure, which includes screening patients, improve relevant management, and standardize the follow-up visit, assessing outcomes and data management. The ethics committee of The First Affiliated Hospital of Zhengzhou University will audit trial conduct per 12 months.

# **11 Statistical analysis**

Normality was assessed using the Shapiro-Wilk test. Continuous variables are presented as mean (SD) or median (IQR), and categorical variables as number (%), based on distribution. Longitudinal data were analyzed with repeated-measures ANOVA. Linear mixed-effects models analyzed repeated measures data, employing unstructured covariance matrices with subject identification as a random effect and time, group, and group-by-time interaction as fixed effects. Significant interactions underwent post-hoc pairwise comparisons with Bonferroni adjustment for multiple testing. Missing data were accommodated within the mixed-effects framework. Between-group comparisons used Student's t-test or Mann-Whitney U test for parametric and nonparametric data, respectively. Confidence intervals (95%) were estimated using the Hodges-Lehmann method. Categorical data were compared using χ² or Fisher's exact tests, while ordinal variables were analyzed with Wilcoxon rank-sum tests. Primary outcomes are reported with 95% confidence intervals. A P value less than 0.05 indicated statistical significance. Statistical analyses were performed using RStudio version 4.3.1 (RStudio, Boston, MA).

# **References**

1. Epstein, L.J.; Kristo, D.; Strollo, P.J.J.r.; Friedman, N.; Malhotra, A.; Patil, S.P.; Ramar, K.; Rogers, R.; Schwab, R.J.; Weaver, E.M.; et al. Clinical guideline for the evaluation, management and long-term care of obstructive sleep apnea in adults. J. Clin. Sleep Med. 2009, 5, 263–276.
2. Flemons, W.W.; Buysse, D.; Redline, S. Sleep-related breathing disorders in adults: Recommendations for syndrome definition and measurement techniques in clinical research. Sleep 1999, 22, 667–689.
3. Meliante, P. G.; Zoccali, F.; Cascone, F.; Di Stefano, V.; Greco, A.; De Vincentiis, M.; Petrella, C.; Fiore, M.; Minni, A.; Barbato, C. Molecular Pathology, Oxidative Stress, and Biomarkers in Obstructive Sleep Apnea. Int. J. Mol. Sci. 2023, 24 (6), 5478.
4. Unnikrishnan D, Jun J, Polotsky V. Inflammation in sleep apnea: an update. Rev Endocr Metab Disord. 2015;16:25–34.
5. Ditmer, M.; Gabryelska, A.; Turkiewicz, S.; Białasiewicz, P.; Małecka-wojciesko, E.; Sochal, M. Sleep Problems in Chronic Inflammatory Diseases: Prevalence, Treatment, and New Perspectives: A Narrative Review. J. Clin. Med. 2021, 11, 67.
6. Imani, M.M.; Sadeghi, M.; Khazaie, H.; Emami, M.; Sadeghi Bahmani, D.; Brand, S. Evaluation of Serum and Plasma Interleukin-6 Levels in Obstructive Sleep Apnea Syndrome: A Meta-Analysis and Meta-Regression. Front. Immunol. 2020, 11, 1343.
7. Nadeem, R.; Molnar, J.; Madbouly, E.M.; Nida, M.; Aggarwal, S.; Sajid, H.; Naseem, J.; Loomba, R. Serum Inflammatory Markers in Obstructive Sleep Apnea: A Meta-Analysis. J. Clin. Sleep Med. 2013, 9, 1003–1012.
8. Kosmas CE, Silverio D, Sourlas A, Montan PD, Guzman E, Garcia MJ. Antiinflammatory therapy for cardiovascular disease. Ann Trans Med. 2019;7:147.
9. Akbari M, Hassan-Zadeh V. IL-6 signalling pathways and the development of type 2 diabetes. Inflammopharmacology. 2018;26:685–98.
10. Tegeler C, O'Sullivan JL, Bucholtz N, Goldeck D, Pawelec G, SteinhagenThiessen E, Demuth I. The inflammatory markers CRP, IL-6, and IL-10 are associated with cognitive function--data from the Berlin Aging Study II. Neurobiol Aging. 2016;38:112–7
11. Vgontzas, A.N.; Papanicolaou, D.A.; Bixler, E.O.; Lotsikas, A.; Zachman, K.; Kales, A.; Prolo, P.; Wong, M.L.; Licinio, J.; Gold, P.W.; et al. Circadian Interleukin-6 Secretion and Quantity and Depth of Sleep. J. Clin. Endocrinol. Metab. 1999, 84, 2603–2607.
12. Ghezzi, P.; Dinarello, C.A.; Bianchi, M.; Rosandich, M.E.; Repine, J.E.; White, C.W. Hypoxia Increases Production of Interleukin-1 and Tumor Necrosis Factor by Human Mononuclear Cells. Cytokine 1991, 3, 189–194.
13. Kaczmarski, P.; Karuga, F. F.; Szmyd, B.; Sochal, M.; Białasiewicz, P.; Strzelecki, D.; Gabryelska, A. The Role of Inflammation, Hypoxia, and Opioid Receptor Expression in Pain Modulation in Patients Suffering from Obstructive Sleep Apnea. Int. J. Mol. Sci. 2022, 23 (16), 9080.
14. Cozowicz, C.; Memtsoudis, S. G. Perioperative Management of the Patient With Obstructive Sleep Apnea: A Narrative Review. Anesth. Analg. 2021, 132 (5), 1231–1243.
15. Kaw R, Michota F, Jaffer A, Ghamande S, Auckley D, Golish J. Unrecognized sleep apnea in the surgical patient: implications for the perioperative setting. Chest. (2006) 129:198–205. 10.1378/chest.129.1.198
16. Cheng, Y.-J.; Lin, C.-H.; Lane, H.-Y. Ketamine, Benzoate, and Sarcosine for Treating Depression. Neuropharmacology 2023, 223, 109351.
17. Wang, T.; Weng, H.; Zhou, H.; Yang, Z.; Tian, Z.; Xi, B.; Li, Y. Esketamine Alleviates Postoperative Depression-like Behavior through Anti-Inflammatory Actions in Mouse Prefrontal Cortex. J. Affect. Disord. 2022, 307, 97–107.
18. Rundin, L.; Sellgren, C.M.; Lim, E.; Grit, J.; Palsson, E.; Landen, M.; Samuelsson, M.; Lundgren, K.; Brundin, P.; Fuchs, D.; et al. An enzyme in the kynurenine pathway that governs vulnerability to suicidal behavior by regulating excitotoxicity and neuroinflammation. Transl. Psychiatry 2016, 6, e865.
19. Matveychuk, D.; Thomas, R.K.; Swainson, J.; Khullar, A.; Mackay, M.-A.; Baker, G.B.; Dursun, S.M. Ketamine as an antidepressant: Overview of its mechanisms of action and potential predictive biomarkers. Ther. Adv. Psychopharmacol. 2020, 10, 2045125320916657.
20. Verdonk, F.; Petit, A.-C.; Abdel-Ahad, P.; Vinckier, F.; Jouvion, G.; de Maricourt, P.; De Medeiros, G.F.; Danckaert, A.; Van Steenwinckel, J.; Blatzer, M.; et al. Microglial production of quinolinic acid as a target and a biomarker of the antidepressant effect of ketamine. Brain Behav. Immun. 2019, 81, 361–373.
21. Chen MH, Li CT, Lin WC, Hong CJ, Tu PC, Bai YM, et al. Rapid inflammation modulation and antidepressant efficacy of a low-dose ketamine infusion in treatment-resistant depression: a randomized, double-blind control study. Psychiatry Res. 2018;269:207–11.
22. Loix S, De Kock M, Henin P. The anti-inflammatory effects of ketamine: state of the art. Acta Anaesthesiol Belg. 2011;62(1):47–58.
23. Chen MH, Li CT, Lin WC, Hong CJ, Tu PC, Bai YM, et al. Rapid inflammation modulation and antidepressant efficacy of a low-dose ketamine infusion in treatment-resistant depression: a randomized, double-blind control study. Psychiatry Res. 2018;269:207–11.

Supplemental Figure 1. Hemodynamic Measurements of the two groups.

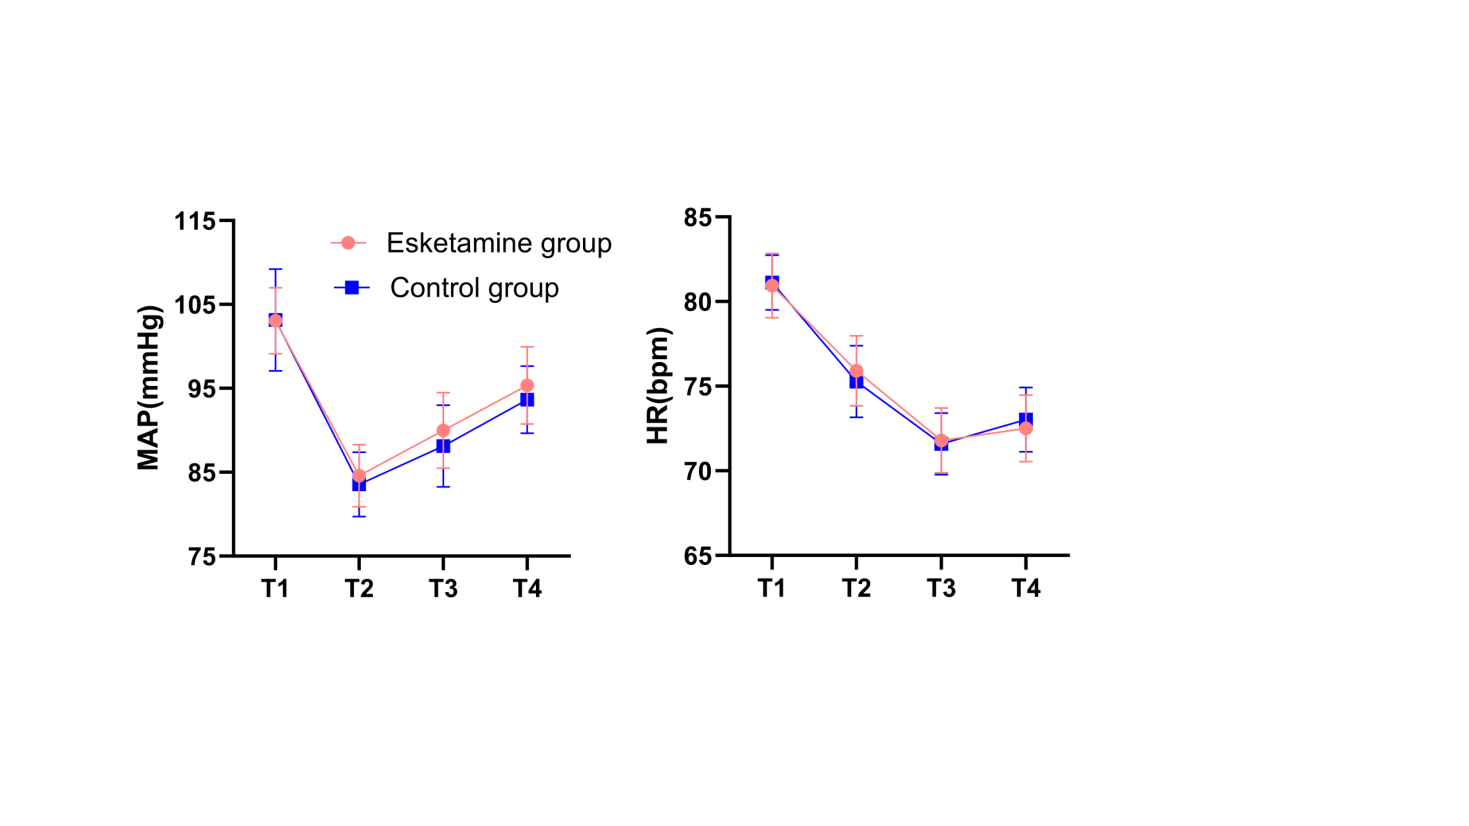


Values represent the estimated means with standard error; analyses were conducted with the use of a mixed-effects model; time, group*time as fixed effects.
Abbreviations: MAP: mean arterial pressure ; HR, heart rate; T1: pre- induction, T2: immediately after tracheal extubation, T3: at the end of anesthesia, T4: immediately post-extubation.

Supplemental Table 1. Patients anxiety, depression and sleep comparison **(**HADS-A, HADS-D, ESS, Patient satisfaction score)

|  | **Esketamine (n =47)** | **Control (n =47)** | ***P- value*** |
| --- | --- | --- | --- |
| **Preoperative** |  |  |  |
| HADS-A, median [IQR] | 7.0 [6.0, 8.0] | 7.0 [6.0, 8.0] | 0.659 |
| HADS-D, median [IQR] | 6.0 [5.0, 7.0] | 6.0 [5.0, 7.0] | 0.626 |
| ESS, mean (SD) | 10.2 (2.3) | 10.4 (3.8) | 0.697 |
| **POD1** |  |  |  |
| HADS-A, median [IQR] | 5.0 [4.0, 6.0] | 6.0 [4.0, 7.0] | 0.261 |
| HADS-D, median [IQR] | 4.0 [3.0, 5.0] | 4.0 [4.0, 5.0] | 0.411 |
| ESS, mean (SD) | 10.3 (3.6) | 10.2 (2.2) | 0.809 |
| Patient satisfaction score, median [IQR] | 7.0 [6.0, 7.0] | 6.0 [5.0, 7.0] | <0.001 |
| **POD2** |  |  |  |
| HADS-A, median [IQR] | 5.0 [5.0, 6.0] | 5.0 [5.0, 6.0] | 0.777 |
| HADS-D, median [IQR] | 4.0 [3.0, 4.0] | 4.0 [3.0, 5.0] | 0.144 |
| ESS, mean (SD) | 9.3 (4.7) | 9.0 (2.1) | 0.777 |
| Patient satisfaction score, median [IQR] | 8.0 [7.0, 10.0] | 7.0 [7.0, 7.0] | <0.001 |
| **POD7** |  |  |  |
| HADS-A, median [IQR] | 4.0 [4.0, 5.0] | 5.0 [4.0, 6.0] | 0.014 |
| HADS-D, median [IQR] | 3.0 [2.0, 4.0] | 3.0 [2.0, 4.0] | 0.534 |
| ESS, mean (SD) | 8.0 (2.2) | 8.5 (2.6) | 0.373 |
| Patient satisfaction score, median [IQR] | 9.0 [8.0, 10.0] | 8.0 [7.0, 9.0] | <0.001 |

NOTE. Data are presented as mean ± SD or median with IQR.
Abbreviations: HADS-A: Hospital Anxiety and Depression Scale-Anxiety; HADS-D: Hospital Anxiety and Depression Scale-Depression; ESS: Epworth Sleepiness Scale.

Supplemental Table 2. Clinical implications and benefit-risk trade-off for esketamine in OSAS patients

| Group | Total Patients (n) | Patients Meeting Criteria (n)a | Patients Meeting Criteria (n)b | NNT | NNH | NNT/NNH |
| --- | --- | --- | --- | --- | --- | --- |
| Esketamine | 47 | 30 | 17 | - | - | - |
| Control | 47 | 24 | 9 | - | - | - |
| Value | - | - | - | 7.874 | 5.882 | 1.339 |

NOTE. aNNT (Number Needed to Treat)​ was calculated based on the beneficial outcome of "achieving the MCID (Minimal Clinically Important Difference) in the QoR-15 score on postoperative day 2 (POD2)". NNT = 1 / (Proportion in Esketamine Group - Proportion in Control Group); bNNH (Number Needed to Harm)​ was calculated based on the adverse outcome of "PACU stay prolonged by >30 minutes". NNH = 1 / (Proportion in Esketamine Group - Proportion in Control Group).The dashes (-) in the table indicate that the cell is not applicable for that row-group combination.
